# Supplementary material
Source: MDPI journal article supplement (https://www.mdpi.com/2072-4292/16/9/1623)
Supplement: s1 [file s1]

## Supplementary Materials

Table S1 Abbreviation or symbols

| Abbreviation or symbols |                                          | Abbreviation or symbols |                                                      |
|-------------------------|------------------------------------------|-------------------------|------------------------------------------------------|
| Abpm                    | Adsorption Based Productivity Model      | MUMM                    | Management Unit of the North Sea Mathematical Models |
| ADEOS                   | Advanced Earth Observation Satellite     | Mar Pollut Bull         | Marine Pollution Bulletin                            |
| ABs                     | Algal blooms                             | MOS                     | Maritime Observation Satellite                       |
| AFAI                    | Alternative floating algae index         | MCC                     | Maximum cross-correlation                            |
| $a_w$                   | Assumption of the pure water absorption  | MERIS                   | Medium Resolution Imaging Spectrometer Instrument    |
| AC                      | Atmospheric correction                   | MODIS                   | Moderate Resolution Imaging Spectroradiometer        |
| $b_{bp}(\lambda)$       | Backscattering coefficients              | MLP                     | Multi-Layer Perceptron                               |
| BBHR                    | Bio-optical hyperspectral reconstruction | NASA                    | National Aeronautics and Space Administration        |
| BPNN                    | BP neural network                        | NIR                     | Near-infrared                                        |
| CNKI                    | China National Knowledge Infrastructure  | NPP                     | Net primary production                               |

---

|                |                                                                |                   |                                                             |
|----------------|----------------------------------------------------------------|-------------------|-------------------------------------------------------------|
| COCTS          | Chinese Ocean Color and Temperature Scanner                    | NDVI              | Normalized difference vegetation index                      |
| Chla           | Chlorophyll a                                                  | NMI               | Normalized mutual information                               |
| CZCS           | Coastal Zone Color Scanner                                     | NRTI              | Normalized red tide index                                   |
| CDOM           | Colored dissolved organic matter                               | OCTS              | Ocean Color and Temperature Scanner                         |
| COMS           | Communication Ocean and Meteorological Satellite               | OSMI              | Ocean Scanning Multispectral Imager                         |
| Cont Shelf Res | Continental Shelf Research                                     | Ocean Sci J       | Ocean Science Journal                                       |
| CNN-TL         | Convolutional neural network transfer learning model           | OE                | Optics EXPRESS                                              |
| CBI            | Cyanobacterial bloom intensity                                 | POC               | Particulate organic carbon                                  |
| $k_d$          | Diffuse attenuation coefficient                                | PC                | Phycocyanin                                                 |
| DOC            | Dissolved organic carbon                                       | PMRIS             | Playful Magnetic Resonance Imaging Simulator                |
| DB-SFNet       | Dual-branch sea fog detection network                          | POLDER            | Polarization and Directionality of the Earth's Reflectances |
| Earth-Sci Rev  | Earth-Science Reviews                                          | RF                | Random forest                                               |
| ESTARFM        | Enhanced spatial and temporal adaptive reflection fusion model | $L_{rc}(\lambda)$ | Rayleigh-corrected radiance                                 |

---

|                        |                                                          |                   |                                       |
|------------------------|----------------------------------------------------------|-------------------|---------------------------------------|
| Environ Res Commun     | Environmental Research Communications                    | RI                | Red tide index                        |
| Environ Sci Pollut Res | Environmental Science and Pollution Research             | RS                | Remote sensing                        |
| ESA                    | European Space Agency                                    | RSE               | Remote Sensing of Environment         |
| FAC                    | Floating algae cover                                     | $R_{rs}(\lambda)$ | Remote sensing reflectance            |
| FLH                    | Fluorescence line height                                 | Sci Total Environ | Science of the Total Environment      |
| GABI                   | Generalized algal bloom index algorithm                  | SFDD              | Sea fog data set                      |
| GLI                    | Generation Global Imager                                 | SIA               | Sea ice area                          |
| GLIMR                  | Geostationary Littoral Imaging and Monitoring Radiometer | SIT               | Sea ice thickness                     |
| GOCST                  | Geostationary oceancolor satellite                       | SSCs              | Sea surface currents                  |
| GOCS                   | Geostationary oceancolor sensors                         | SSS               | Sea surface salinity                  |
| HABs                   | Harmful algal blooms                                     | SeaWiFS           | Sea-viewing Wide Field-of-view Sensor |
| IEEE T-GRS             | IEEE TRANSACTIONS ON GEOSCIENCE AND REMOTE SENSING       | SeaDAS            | SeaWiFS Data Analysis System          |
| IGAG                   | Index of floating Green Algae for GOCI                   | SDD               | Secchi disk depth                     |

---

|                      |                                                                       |              |                                          |
|----------------------|-----------------------------------------------------------------------|--------------|------------------------------------------|
| Indian J Geo-Mar Sci | Indian Journal of Geo-Marine Sciences                                 | SGLI         | Second Generation Global Imager          |
| ICWs                 | Inland and coastal waters                                             | SWIR         | Shortwave infrared                       |
| JAG                  | International Journal of Applied Earth Observation and Geoinformation | SERT         | Simple semi-empirical radiative transfer |
| Int J Remote Sens    | International Journal of Remote Sensing                               | SMAP         | Soil Moisture Active Passive             |
| ISPRS                | ISPRS Journal of Photogrammetry and Remote Sensing                    | SZA          | Solar zenith angle                       |
| JAXA                 | Japan Aerospace Exploration Agency                                    | Spat Inf Res | Spatial Information Research             |
| J Appl Remote Sens   | Journal of Applied Remote Sensing                                     | ESOA         | Spectral optimization algorithm          |
| J Environ Manage     | Journal of Environmental Management                                   | SVR          | Support vector regression                |
| JGR                  | Journal of Geophysical Research-Oceans                                | SPM          | Suspended particulate matter             |
| J Mar Sci Eng        | Journal of Marine Science and Engineering                             | SCI          | Synthetic chlorophyll index              |
| J Mar Sci Tech       | Journal of Marine Science and Technology                              | GOCI         | The Geostationary Oceanscolor Imager     |
| J Quant Spectrosc Ra | Journal of Quantitative Spectroscopy & Radiative Transfer             | UV           | Ultraviolet                              |
| J Sea Res            | Journal of Sea Research                                               | VIIRS        | Visible Infrared Imaging Radiometer      |

---

|                      |                                  |     |                                       |
|----------------------|----------------------------------|-----|---------------------------------------|
| Korean J Remote Sens | Korean Journal of Remote Sensing | WR  | Water Research                        |
| KOMPSAT-1            | Korea Multi-Purpose Satellite-1  | YRE | Yalu River estuary                    |
| Limnol Oceanogr      | Limnology and Oceanography       | YOC | Yellow and East China Sea Oceanscolor |
| LCI                  | Linear Combination Index         |     |                                       |

Table S2 The number of articles published based on GOCI in the past ten years, the country, the study area, and research direction

| Number of |           |             |             |                     |
|-----------|-----------|-------------|-------------|---------------------|
| Years     | published | Country     | Study Area  | Research Directions |
|           | papers    |             |             |                     |
| 2023      | 1         | USA         | /           | DOC                 |
|           | 2         | South Korea | /           | Algal blooms        |
|           |           |             | /           | Red tide            |
|           | 8         | China       | Lake Chagan | Lake ice            |

---

|      |   |             |              |                          |
|------|---|-------------|--------------|--------------------------|
|      |   |             | Hangzhou Bay | Chla                     |
|      |   |             | Hangzhou Bay | SPM                      |
|      |   |             | Bohai Sea    | SPM                      |
|      |   |             | The Yangtze  | Chla                     |
|      |   |             | Yellow Sea   | Chla                     |
|      |   |             | /            | Red tide                 |
|      |   |             | Lake Taihu   | Algal blooms             |
| 2022 | 1 | USA         | /            | Decadal Measurements     |
|      | 3 | South Korea | Land Surface | Atmospheric reflectivity |
|      |   |             | /            | Machine learning         |
|      |   |             | Bohai Sea    | Red tide                 |
|      | 9 | China       | Chaohu Lake  | Chla                     |
|      |   |             | /            | Machine learning         |

---

|       |   |             |                       |                      |
|-------|---|-------------|-----------------------|----------------------|
| <hr/> |   |             |                       |                      |
|       |   |             | Hangzhou Bay          | SPM                  |
|       |   |             | The East China Sea    | Algal blooms         |
|       |   |             | Turbid Coastal Waters | SPM                  |
|       |   |             | /                     | NPP                  |
|       |   |             | /                     | Sea surface salinity |
|       |   |             | /                     | Sea surface currents |
|       |   |             | /                     | Sea fog              |
| 2021  | 1 | India       | Yellow Sea            | Algal blooms         |
|       | 3 | South Korea | /                     | FLH algorithm        |
|       |   |             | /                     | Chla                 |
|       |   |             | Yellow Sea            | SPM                  |
|       | 7 | China       | The Yangtze           | SPM                  |
|       |   |             | Lake Taihu            | POC                  |
| <hr/> |   |             |                       |                      |

---

|      |   |             |                             |                        |
|------|---|-------------|-----------------------------|------------------------|
|      |   |             | Taiwan coastal waters       | SPM                    |
|      |   |             | Yellow Sea                  | Algal blooms           |
|      |   |             | /                           | Sea ice                |
|      |   |             | Eutrophic Lake              | POC                    |
|      |   |             | The East China Sea          | K <sub>d</sub>         |
| 2020 | 3 | South Korea | Turbid water                | Water reflectance      |
|      |   |             | Turbid water                | Atmospheric correction |
|      |   |             | /                           | Sea fog                |
|      | 9 | China       | /                           | Chla                   |
|      |   |             | Shallow and eutrophic lakes | Water clarity          |
|      |   |             | Turbid Coastal Waters       | Water clarity          |
|      |   |             | Lake Taihu                  | Atmospheric correction |
|      |   |             | Turbid Coastal Waters       | Atmospheric correction |

---



---

|      |    |             |                           |                        |
|------|----|-------------|---------------------------|------------------------|
|      |    |             | Turbid Coastal Waters     | Chla                   |
|      |    |             | Lake Taihu                | Chla                   |
|      |    |             | Lake Taihu                | Chla/ Algal blooms     |
|      |    |             | The East China Sea        | Chla                   |
| 2019 | 1  | India       | /                         | Chla                   |
|      | 1  | South Korea | /                         | SPM                    |
|      | 10 | China       | Lake Taihu                | SPM                    |
|      |    |             | Lake Taihu                | SPM                    |
|      |    |             | Yellow Sea                | Atmospheric correction |
|      |    |             | Turbid water              | Atmospheric correction |
|      |    |             | The East China Sea        | Algal blooms           |
|      |    |             | Bohai Sea                 | Sea ice                |
|      |    |             | Coastal and inland waters | HABs                   |

---

---

|      |   |             |                      |                      |
|------|---|-------------|----------------------|----------------------|
|      |   |             | The Yangtze          | POC                  |
|      |   |             | Yellow Sea           | Sea surface salinity |
|      |   |             | Jiaozhou Bay         | Review               |
| 2018 | 1 | South Korea | /                    | HABs                 |
|      |   |             | East Sea             | Algal blooms         |
|      | 8 | China       | The Yangtze          | SPM                  |
|      |   |             | Yongjiang Estuary    | SPM                  |
|      |   |             | /                    | SPM                  |
|      |   |             | Lake Taihu           | Algal blooms         |
|      |   |             | Lake Taihu           | SPM                  |
|      |   |             | The Yangtze          | SPM                  |
|      |   |             | Yellow Sea           | Algal blooms         |
|      |   |             | Bohai Sea/Yellow Sea | Water clarity        |

---

---

|      |   |             |                      |                        |
|------|---|-------------|----------------------|------------------------|
| 2017 | 2 | South Korea | /                    | Green tide             |
|      |   |             | /                    | SPM                    |
|      | 9 | China       | Yellow River         | Turbidity              |
|      |   |             | /                    | Literature Review      |
|      |   |             | Dongping Lake        | Chla                   |
|      |   |             | The Yangtze          | Atmospheric correction |
|      |   |             | The Yangtze          | CDOM                   |
|      |   |             | Lake Taihu           | DOC                    |
|      |   |             | Yellow Sea           | Green tide             |
|      |   |             | Yellow Sea/Bohai Sea | PC                     |
|      |   |             | Highly turbid waters | Sea surface currents   |
| 2016 | 2 | South Korea | Yellow Sea           | Sea ice                |
|      |   |             | North-East Asian     | Chla                   |

---

|       |   |             |                          |                         |
|-------|---|-------------|--------------------------|-------------------------|
| <hr/> |   |             |                          |                         |
|       | 7 | China       | /                        | Turbidity               |
|       |   |             | Lake Taihu               | Chla                    |
|       |   |             | Lake Taihu               | TP                      |
|       |   |             | Bohai Sea                | SPM                     |
|       |   |             | Bohai Sea                | Sea ice                 |
|       |   |             | Yellow Sea               | Turbidity               |
|       |   |             | /                        | K <sub>d</sub>          |
| 2015  | 1 | South Korea | The East China Sea       | Algal blooms            |
|       | 1 | Netherlands | The Yangtze              | Attenuation coefficient |
|       | 5 | China       | Lake Taihu               | Chla                    |
|       |   |             | Lake Taihu               | Algal blooms            |
|       |   |             | Inland Waters            | Chla                    |
|       |   |             | Lake Taihu/Dongting Lake | Chla                    |
| <hr/> |   |             |                          |                         |

---

|      |   |             |                      |                        |
|------|---|-------------|----------------------|------------------------|
|      |   |             | Bohai Sea            | Sea ice                |
| 2014 | 1 | USA         | /                    | Turbidity              |
|      | 4 | China       | /                    | Literature Review      |
|      |   |             | The East China Sea   | Algal blooms           |
|      |   |             | Bohai Sea            | Sea ice                |
|      |   |             | /                    | Sea surface currents   |
| 2013 | 1 | South Korea | Coastal waters       | SPM                    |
|      | 4 | China       | /                    | Sediment               |
|      |   |             | Coastal waters       | SPM                    |
|      |   |             | Coastal waters       | Sea surface currents   |
|      |   |             | Yellow River Estuary | SPM                    |
| 2012 | 1 | China       | Complex waters       | Atmospheric correction |
|      | 4 | South Korea | /                    | Floating Green Algae   |

---

---

|      |   |             |                      |                        |
|------|---|-------------|----------------------|------------------------|
|      |   |             | /                    | Atmospheric correction |
|      |   |             | East Sea             | CDOM                   |
|      |   |             | Bohai Sea            | SPM                    |
| 2011 | 1 | South Korea | /                    | Literature review      |
| 2010 | 1 | France      | The East China Sea   | SPM                    |
|      | 1 | South Korea | /                    | Literature review      |
|      | 2 | China       | Turbid inland waters | Chla                   |
|      |   |             | /                    | Atmospheric correction |

---
